# Supplementary material for: Wild-type IDH2 contributes to Epstein–Barr virus-dependent metabolic alterations and tumorigenesis
Source: PubMed Central journal article supplement — Mol Metab. 2020 Feb 18;36:100966. doi: 10.1016/j.molmet.2020.02.009 (PMC7109632; doi:10.1016/j.molmet.2020.02.009), 2020-02-18
Supplement: mmc3.pdf [file mmc3.pdf]

## Supplementary Tables

**Table S1. Univariate and multivariate COX regression analysis of disease-free survival of HNSCC patients**

| Variable                    | Univariate analysis |             |                | Multivariate analysis |             |                |
|-----------------------------|---------------------|-------------|----------------|-----------------------|-------------|----------------|
|                             | HR                  | 95% CI      | <i>p</i> value | HR                    | 95% CI      | <i>P</i> value |
| Age ( $\geq 61$ vs $< 61$ ) | 1.126               | 0.812-1.560 | 0.477          |                       |             |                |
| Sex (Male vs Female)        | 1.450               | 0.969-2.171 | 0.0708         |                       |             |                |
| Grade (G3/G4 vs G1/G2)      | 0.808               | 0.552-1.184 | 0.275          |                       |             |                |
| pT (T3/T4 vs T1/T2)         | 1.437               | 0.997-2.071 | 0.0519         |                       |             |                |
| pN (N1/N2/N3 vs N0)         | 1.617               | 1.116-2.342 | 0.0111*        | 1.510                 | 1.012-2.253 | 0.0433*        |
| pM (M1 vs M0)               | 1.223               | 0.171-8.754 | 0.841          |                       |             |                |
| Stage (IV vs I/II/III)      | 1.575               | 1.108-2.238 | 0.0114*        | 1.434                 | 0.954-2.156 | 0.0829         |
| IDH2 (H vs L)               | 1.401               | 1.008-1.946 | 0.0445*        | 1.385                 | 0.959-1.999 | 0.0821         |

HR, hazard ratio; CI, confidence interval; G1, well differentiated; G2, moderately differentiated; G3, poorly differentiated; G4, Undifferentiated; pT, pathologic T stage; pN, lymph node metastases; pM, distant metastasis; H, high expression; L, low expression; \*, significant difference.

**Table S2. IDH2 expression positively correlates with LMP1 in NPC tissues**

| IDH2     |                |      |                         |       |
|----------|----------------|------|-------------------------|-------|
| Biopsies | Spearman's rho | LMP1 | Correlation coefficient | 0.571 |
|          |                |      | Significant (2-tailed)  | 0.007 |
|          |                |      | N                       | 21    |

**Table S3. IDH2 expression positively correlates with c-Myc in NPC tissues**

| IDH2     |                |       |                         |       |
|----------|----------------|-------|-------------------------|-------|
| Biopsies | Spearman's rho | c-Myc | Correlation coefficient | 0.482 |
|          |                |       | Significant (2-tailed)  | 0.043 |
|          |                |       | N                       | 18    |
